# Supplementary material
Source: PubMed Central journal article supplement (PMC3463360)
Supplement: supp_M112.351569_jbc.M112.351569-4.pdf [file supp_M112.351569_jbc.M112.351569-4.pdf]

**Stealth siRNA (Invitrogen)**

|         |                               |
|---------|-------------------------------|
| Acf1    | MSS278242                     |
| Anp32B  | MSS244994                     |
| Asf1    | MSS227786                     |
| Atrx    | MSS212902                     |
| Baf45a  | MSS231302                     |
| Caf1    | MSS219448                     |
| Daxx    | MSS203475                     |
| Dek     | MSS272813                     |
| Dis3    | MSS231716;MSS231718           |
| Exosc3  | MSS288012;MSS288013;MSS288047 |
| Hells   | MSS205089                     |
| Hira    | MSS205134                     |
| Hjurp   | Designed                      |
| Ino80   | MSS228942                     |
| Iws1    | MSS232049;MSS232050;MSS232051 |
| Nap111  | MSS285005                     |
| Nap113  | MSS225671                     |
| Nasp    | Designed                      |
| Nsd1    | MSS276083                     |
| Rcor2   | MSS272320                     |
| Ruvbl2  | MSS208748                     |
| Scrap   | MSS270699                     |
| Setd2   | MSS215131                     |
| Smarca1 | MSS225599                     |
| Spt16   | MSS201669                     |
| Spt6    | MSS209821                     |
| Spt6    | HSS110374                     |
| Ssrp1   | MSS209558                     |
| Suv39h2 | MSS227126                     |

**Antibodies**

|               |            |             |      |
|---------------|------------|-------------|------|
| Spt6          | A300-803A  | Bethyl      | ChIP |
| S5P Pol II    | ab5131     | Abcam       | ChIP |
| Pol II(H-224) | sc-9001    | Santa Cruz  | ChIP |
| Set1          | ab70378    | Abcam       | ChIP |
| H2A           | ab18255    | Abcam       | ChIP |
| H2B           | ab1790     | Abcam       | ChIP |
| H3            | ab1791     | Abcam       | ChIP |
| H3K4me3       | 17-614     | Millipore   | ChIP |
| H3K36me3      | ab9050     | Abcam       | ChIP |
| H3K27me3      | ab6002     | Abcam       | ChIP |
| H3R3          | 07-585     | Millipore   | ChIP |
| $\gamma$ H2AX | 05-636     | Millipore   | ChIP |
| Spt6          | A300-802A  | Bethyl      | WB   |
| Caf1          | 17037-1-AP | Proteintech | WB   |
| Asf1          | 2769       | Proteintech | WB   |
| Atrx          | S1800      | Epitomics   | WB   |
| Dek           | 16448-1-AP | Proteintech | WB   |
| Daxx          | 20489-1    | Proteintech | WB   |

## CH12F3-2A

### ChIP Analysis

#### IgH locus

Forward primer

A 5'- CCGAAAGTCCAGGCTGAGCAAACACCACC  
B 5'- AAGGGCTTCTAAGCCAGTCC  
C 5'- AAAGAGACATTTGTGTGCTTTGAGTACCG  
D 5'- CAATGTGGTTAATGAATTTGAAGTTGCCA  
E 5'- GCTAAACTGAGGTGATTACTCTGAGGTAAG  
F 5'- CAGCACCATTTCTTCCACCTGGAACACTACA  
K 5'- ACACAGAAACCCCAAGATG  
L 5'- CAGGGGCAGGTTAGAATGAA  
M 5'- GAGTGTGGGGATCCAGGTAA  
N 5'- GGATCTGCTGCCAAACTAA  
H 5'- GTGATTCAGGGAGCAAGAGC  
I 5'- TGAAGAACTTTGGATGAAATGTGAACCAA  
J 5'- AGTGCCAGAAAGGAGAATCCGTGAAATGTT

#### Reverse primer

5'- AAGAGGACCTCTCCAGTTTCGGCTGAATCC  
5'- CACAACCATACATTCCCAGGT  
5'- ATGGTTAACAGGCAACATTTTTCTTTTAC  
5'- TCTCACACTCACCTTGGATCTAAGCACTGT  
5'- GTTTAGCTTAGCGGCCAGCTCATTCCAGT  
5'- GGCTAGGTAAGTCCCTGCTCCTCAGTGT  
5'- TTCCCAGAGTCACAGCCTTT  
5'- GCTCTTCTGCGGTTTTTGAC  
5'- CCTTCCATTTGCCATCAGTT  
5'- GGTCAGACTGCAGGACAGC  
5'- TCTAGCCTGGGAGTCTCCTG  
5'- GATACTAGGTTGCATGGCTCCATTACACA  
5'- GACCCCTAACGTTCTTTACCAGAGCAATT

#### AID locus

A 5'- CATGCACAGACCTTAGGTGTGATACCTGGG  
B 5'- ACCCAGGAGGCAGATGTTGGATACCTGGTG  
C 5'- GTAACAGACAGTCTCATCTGCTTGTGCAT  
D 5'- CCAGCTGCAGCAACATAGAGATTTCCAGAC  
E 5'- AGTGCTGAGGTTACAGGCACAAGCAACCTA  
F 5'- CTGGCTGCCACGTGGAATTTGTTTCCCTAC  
G 5'- CGAGATGCATTTGATGTTGGGATTTTGA

5'- TGGGCAGAGCCACACGGATTAATGATTGG  
5'- GTCCATATCGGTCTCCAGCGTGACTTTCTT  
5'- ATCTCTAGCAACACAGAGAAGAGAGAAACC  
5'- TGCTGATTGAAATTTGATATGTTCCGCTT  
5'- CCCAGCCATCTCCCTAATCCTCCTACTGGG  
5'- CTTTGAAGGTCATGATCCCGATCTGGACCC  
5'- AGTTACATCATTGCTCTGGCGGTCCTGTGC

### Mutation analysis

5'-S $\mu$  5'-AATGGATACCTCAGTGGTTTTTAATGGTGG

5'-GCGGCCCGGCTCATTCCAGTTCATTACAG

### Transcript analysis

V- $\mu$ GLT 5'-TGGGGCCAAGGCACCACTCTCACAGTCTCC (JH2-F)  
 $\mu$ GLT 5'- CTCTGGCCCTGCTTATTGTTG (I $\mu$  fwd.)  
S $\mu$ -internal 5'- CAATGTGGTTAATGAATTTGAAGTTGCCA  
 $\alpha$ GLT 5'- CCAGGCATGGTTGAGATAGAGATAG (I $\alpha$  fwd.)  
S $\alpha$ -internal 5'- AATGGGCTGGGCTAGTCTGAACTGG  
AID WT 5'- ATGGACAGCCTTCTGATGAAGCAAAAAG (mAID-F)  
AID isoform 5'- TCTGGCTGCCACGTGGAATTTGTTCCCTA  
AID intronic 5'- AGTGCTGAGGTTACAGGCACAAGCAACCTA  
Hprt 5'- CTCGAAGTGTGGATACAGG

5'- AATGGTGTGGGCAGGAAGT (C $\mu$  rev.)  
(C $\mu$  rev.)  
(C $\mu$  rev.)  
5'- GAGCTGGTGGGAGTGTACAGT(C $\alpha$  rev.)  
(C $\alpha$  rev.)  
5'- TCAAAATCCCAACATACGAAATGCATCTCG(mAID-R)  
(mAID-R)  
5'- CTTTGAAGGTCATGATCCCGATCTGGACCC  
5'- TGGCCTATAGGCTCATAGTG

## BL2

### ChIP Analysis

#### Forward primer

IgH-V (1) 5'- CTCAGTGTGGGTTTTCTGTTTCA  
IgH-V (2) 5'- CATCAGCAGTACTAATTACTACTTGGATTG  
IgH-V (3) 5'- AGTCACCATGTCCGTAGACATGTCC

SNHG3 (1) 5'- GGAGCCAGGAGTGACCTATACTCA  
SNHG3 (2) 5'- TATTCTAGTTGGTCAAGATTTACCT  
SNHG3 (3) 5'- AGCCTGAGCTGAGAAAGATACTAGC

MALAT1 (1) 5'- TTAGAAGGTAAGCTTGAGAAGATG  
MALAT1 (2) 5'- TTCAAGTGAATCTAGGAAGACAGCAG  
MALAT1 (3) 5'- GATTTCCGGGTGTTGTAGGTTTCTC

Hygro-GFP (1) 5'- GGGGAATTCAGCGAGAGCCTGACCTATTGC  
Hygro-GFP (2) 5'- TCATTGACTGGAGCGAGGCGATGTTCCGGG  
Hygro-GFP (3) 5'- GGCGACGTAACCGCCACAAGTTCAGCGTG  
Hygro-GFP (3) 5'- CAGCACGACTTCTTCAAGTCCGCCATGCC

C $\mu$  5'- CTTCTTCCCGACTCCATCAC

#### Reverse primer

5'- GAGCCACCAGAGACAGTGAAGTGA  
5'- CGACTCTCGAGGGATGGGTTGTAGT  
5'- AGTCCCCCCTTCGAGCCACTGGT

5'- TTAATCTATTAGTACAGCAAAACCC  
5'- GAACAGAGCATATGTTGAAGTTATG  
5'- TGGGGAGAGTGACCTCCCAGGGTAT

5'- AGTCCTTTTAGTAGCTTTTGTAGTGT  
5'- CCTGGACTCTTTTCTATCTTCCACCA  
5'- AAACCCACAAACTTGCCATCTACTA

5'- ATCCATGGCCTCCGCGACCGGCTGCAGAAC  
5'- GATGCCTCCGCTCGAAGTAGCGCTGTGCT  
5'- GGTGGGCCAGGGCAGGGCAGCTTCCGGT  
5'- CAGGGTGTCCGCTCGAACTTCCACTCGGC

5'- CGTTCTTTTCTTTGTTGCCGT

### Mutation analysis

IgH-V 5'- ATCTCATGTGCAAGAAAATGAA  
SNHG3 5'- GCCCAGGAGTGACCTATACTCAAA  
MALAT1 5'- GGCAGAAGGCTTTTGAAGA  
BL2-Smu 5'- ATGAATTCGCACCCTTGAAGTAGCC

5'- AGTCCCACCACGCAATCAT  
5'- GGTATCCAGCTTGAAGTGTCA  
5'- CAACATATTGCCGACCTCACGGAT  
5'- ATGGATCCCAGTTCAGCCCTTGTTAGTC

### Transcript analysis

IgH-V 5'- CTATAACCATGGTTCATGAAACACCTGTGGTTC  
SNHG3 5'- CTACTACCTGGCGCACCTCCGCCTGAAGATTGCC  
MALAT1 5'- GGACTTGGCTCAACTCCCTCTTTCTGGAGTGAAG  
Hygro-GFP 5'- GCGAGAAGCGCGCCGCTCGACCGATGGC  
SPT6 5'- CCCTCCAGACCCTCACCGA  
GAPDH 5'- ATCCTGGGCTACACTGAGCA

5'- TGCATGCATTCTAGAAAGGGTTGGGGCGGATGCACTCC  
5'- CCTCAACACCTTGGCAAGCAAGCTCTACAGTCCA  
5'- ACTGGCTGCATCGAGGTGAGGGGTGAAGGGTCT  
5'- GCACCAACCCCGTGAACAGCTCCTCGCCCT  
5'- CGGCTGTTGGCATCAGGGTT  
5'- GGTGGTCCAGGGGTCTTACT
